# Supplementary material for: Mechanical behavior of shark vertebral centra at biologically relevant strains
Source: Oxford University Press journal article supplement (doi:10.1242/jeb.188318), 2018-10-23
Supplement: jeb188318supp.pdf [file jeb188318supp.pdf]

Table S1. Average stiffness (MPa), toughness (MPa) and band pair counts of vertebral centra from mature sharks sampled for the present study and Natanson et al., 2018.

| Species                                              | Anterior (A and C) |                 |           | Posterior (D and E) |                 |           |
|------------------------------------------------------|--------------------|-----------------|-----------|---------------------|-----------------|-----------|
|                                                      | Stiffness          | Toughness       | BP count* | Stiffness           | Toughness       | BP count* |
| Dusky shark<br>( <i>Carcharhinus obscurus</i> )      | 3.9± 0.62          | 2.13e-3±3.93e-4 | 14.5±0.22 | 7.57±1.6            | 3.95e-3±7e-4    | 13.8±0.17 |
| Blue shark<br>( <i>Prionace glauca</i> )             | 5.18±1.43          | 2.88e-3±7.97e-4 | 14.4±0.5  | 3.8±0.62            | 2.25e-3±3.38e-4 | 15±1.29   |
| Shortfin mako<br>( <i>Isurus oxyrinchus</i> )        | 2.57±1.53          | 1.32e-3±7.58e-4 | 27.7±0.91 | 8.38±1.98           | 3.91e-3±9.46e-4 | 18±0.77   |
| Porbeagle shark<br>( <i>Lamna nasus</i> )            | 1.43±0.54          | 8.18e-4±2.66e-4 | 18.5±0.88 | 2.39±0.77           | 1.69e-3±3.71e-4 | 14.5±0.67 |
| Common thresher shark<br>( <i>Alopias vulpinus</i> ) | 0.78±0.15          | 4.93e-4±8.78e-5 | 21.5±0.56 | 1.15±0.22           | 6.4e-4±1.2e-4   | 18.8±0.75 |
| White shark<br>( <i>Carcharodon carcharias</i> )     | 0.35±0.08          | 2.2e-4±4.04e-4  | 25.27±1.6 | 0.89±0.24           | 5.27e-4±1.27e-4 | 16.3±0.61 |

Columns with (\*) are data from Natanson et al., 2018

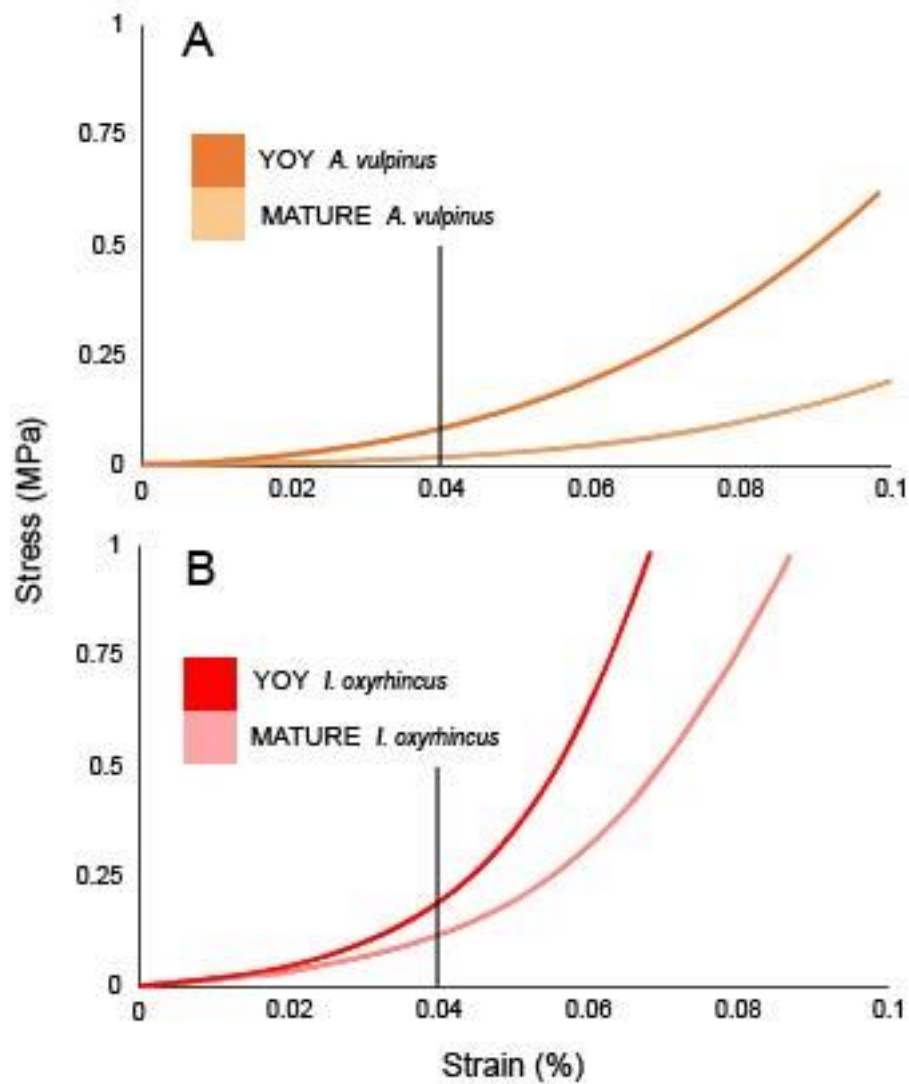

Figure S1. Stress-strain curves of YOY and mature shark centra that were compressed within the elastic (linear) region. 4% strain is the deformation in which stiffness and toughness were calculated. Curves detail data from compression tests from common thresher (A) and shortfin mako (B) and correspond with the x-radiographed YOY and mature shark centra from Figure 4. Dusky stress-strain curves are detailed in Figure 3.

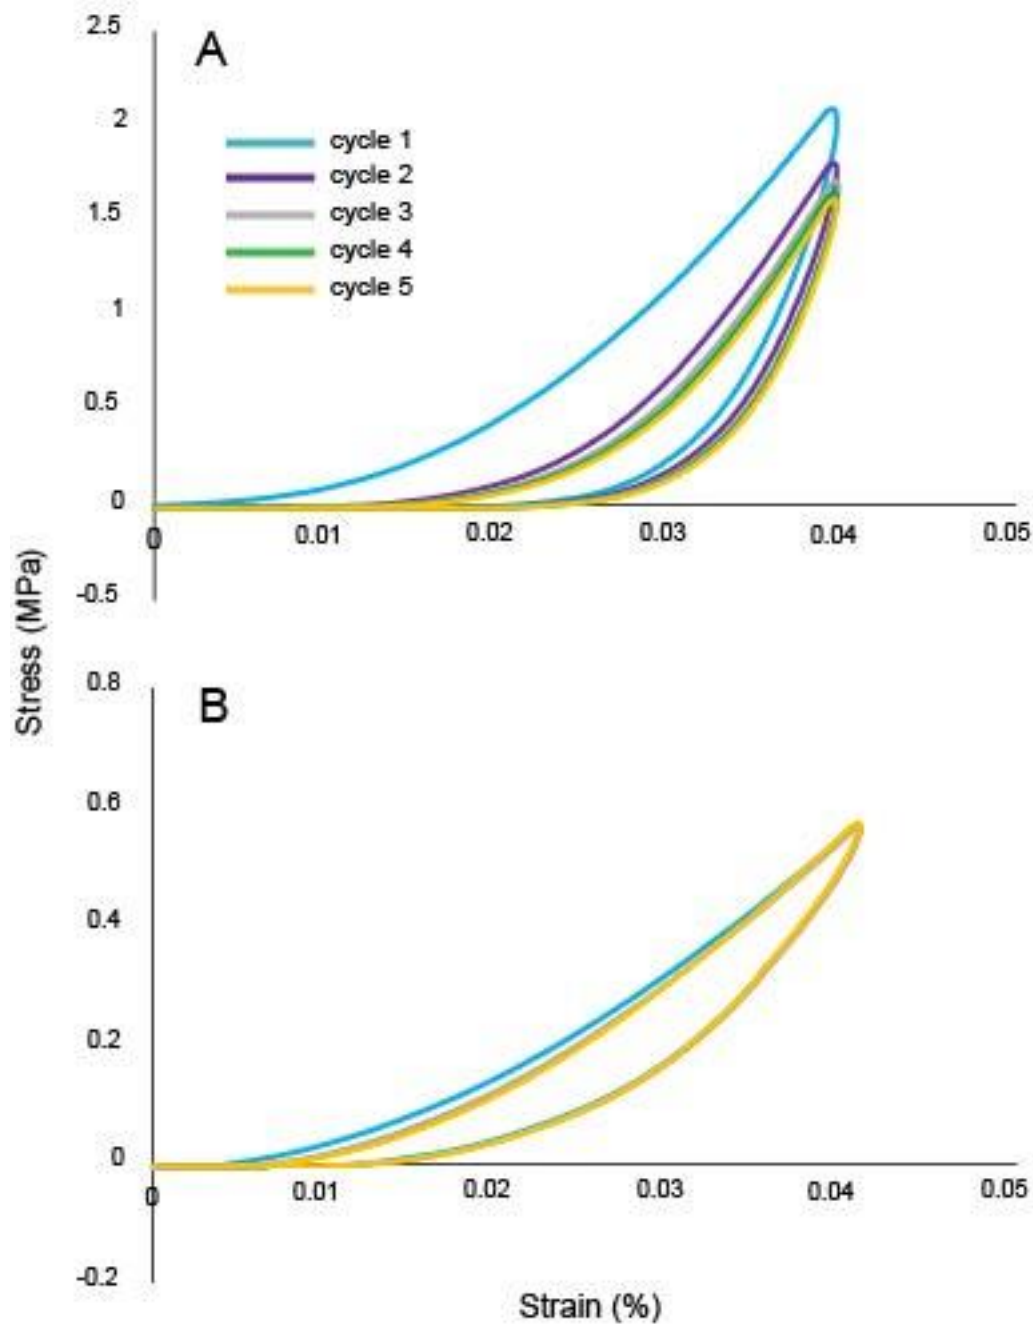

Figure S2. Cyclical tests (5) of centra from two mature sharks at a displacement rate of 0.03mm/s. (A) The centrum from a mature dusky had the following stiffness measures (MPa); cycle 1 = 50.66, cycle 2 = 44.14, cycle 3 = 40.2, cycle 4 = 40.36, cycle 5 = 39.57. (B) Common thresher had similar stiffness values among the five compression cycles; cycle 1 = 13.8, cycle 2 = 13.76, cycle 3 = 13.77, cycle 4 = 13.87, cycle 5 = 13.94.
